# Supplementary material for: Development of a Sensitive Headspace Gas Chromatography–Mass Spectrometry Method for the Simultaneous Determination of Nitrosamines in Losartan Active Pharmaceutical Ingredients
Source: PubMed Central journal article supplement — ACS Omega. 2021 Apr 16;6(16):11048–58. doi: 10.1021/acsomega.1c00982 (PMC8153937; doi:10.1021/acsomega.1c00982), 2021-04-16
Supplement: ao1c00982_si_001.pdf [file ao1c00982_si_001.pdf]

## Supporting information

### **Development of a Sensitive Headspace Gas Chromatography–Mass Spectrometry Method for the Simultaneous Determination of Nitrosamines in Losartan Active Pharmaceutical Ingredients**

Wisut Wichitnithad<sup>1,2</sup>, Orawan Sudtanon<sup>1</sup>, Pawadee Srisunak<sup>1</sup>, Kamonrak Cheewatanakornkool<sup>1</sup>, Siriwan Nantaphol<sup>2</sup> and Pornchai Rojsitthisak<sup>3,4\*</sup>

<sup>1</sup>Department of Analytical Development, Pharma Nueva Co., Ltd., Bangkok, 10900, Thailand.

<sup>2</sup>Department of Clinical Development, Pharma Nueva Co., Ltd., Bangkok, 10900, Thailand.

<sup>3</sup>Department of Food and Pharmaceutical Chemistry, Faculty of Pharmaceutical Sciences, Chulalongkorn University, Bangkok, 10330, Thailand.

<sup>4</sup>Natural Products for Ageing and Chronic Diseases Research Unit, Chulalongkorn University, Bangkok, 10330, Thailand.

\*Corresponding author

Pornchai Rojsitthisak, Ph.D.

Department of Food and Pharmaceutical Chemistry,

Faculty of Pharmaceutical Sciences, Chulalongkorn University,

254 Phayathai Road, Patumwan, Bangkok 10330 Thailand

Tel.: +66-2-218-8310; Fax: +66-2-254-5195; E-mail: pornchai.r@chula.ac.th

## 1. Method development

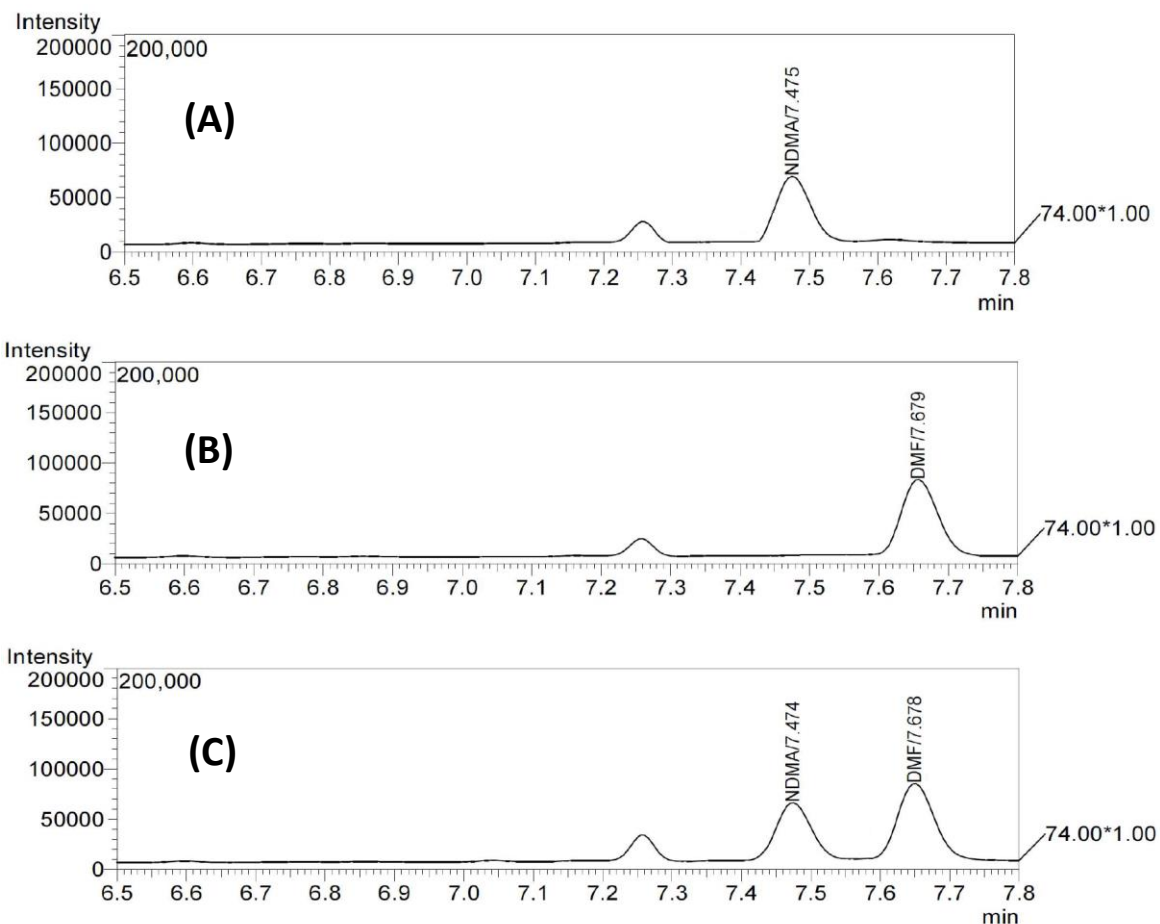

[MS] ID1 Compound Name:NDMA

| Title            | Sample Name  | Ret. Time | Area   | Resolution |
|------------------|--------------|-----------|--------|------------|
| NDMA and DMF.qgd | DMF and NDMA | 7.474     | 178274 | ---        |

[MS] ID2 Compound Name:DMF

| Title            | Sample Name  | Ret. Time | Area   | Resolution |
|------------------|--------------|-----------|--------|------------|
| NDMA and DMF.qgd | DMF and NDMA | 7.678     | 260868 | 2.26       |

Figure S1. The representative chromatograms of (a) spiked NDMA ( $m/z$  74), (b) spiked DMF ( $^{15}\text{N}$  isotopic ion at  $m/z$  74) and (c) co-spiked between NDMA and DMF in losartan

## 2. Robustness

Table S1. System suitability results under HS equilibration time (intra-variation of typical method: 15 min)

| Injection no. | NDMA        |             |             | NDEA        |             |             | EIPNA       |             |             | DIPNA       |             |             |
|---------------|-------------|-------------|-------------|-------------|-------------|-------------|-------------|-------------|-------------|-------------|-------------|-------------|
|               | Peak area   | RT          | Tailing     |
| #1            | 140636      | 7.537       | 1.106       | 70612       | 8.171       | 1.135       | 35203       | 8.446       | 1.154       | 24355       | 8.646       | 1.317       |
| #2            | 128975      | 7.537       | 1.106       | 66265       | 8.170       | 1.151       | 32720       | 8.447       | 1.143       | 22677       | 8.647       | 1.273       |
| #3            | 129689      | 7.535       | 1.105       | 65754       | 8.169       | 1.135       | 32043       | 8.445       | 1.145       | 21965       | 8.646       | 1.241       |
| #4            | 132265      | 7.536       | 1.103       | 68565       | 8.170       | 1.145       | 33557       | 8.446       | 1.152       | 22817       | 8.646       | 1.267       |
| #5            | 131122      | 7.535       | 1.112       | 67767       | 8.168       | 1.159       | 33476       | 8.445       | 1.127       | 22380       | 8.645       | 1.268       |
| Average       | 132537      | 7.536       | 1.106       | 67793       | 8.170       | 1.145       | 33400       | 8.446       | 1.144       | 22839       | 8.646       | 1.273       |
| SD            | 4702.897    | 0.001       | 0.003       | 1938.796    | 0.001       | 0.010       | 1181.639    | 0.001       | 0.011       | 908.232     | 0.001       | 0.027       |
| %CV           | <b>3.55</b> | <b>0.01</b> | <b>0.30</b> | <b>2.86</b> | <b>0.01</b> | <b>0.91</b> | <b>3.54</b> | <b>0.01</b> | <b>0.93</b> | <b>3.98</b> | <b>0.01</b> | <b>2.16</b> |

Table S2. System suitability results under HS equilibration time (intra-variation of 14 min)

| Injection no. | NDMA        |             |             | NDEA        |             |             | EIPNA       |             |             | DIPNA       |             |             |
|---------------|-------------|-------------|-------------|-------------|-------------|-------------|-------------|-------------|-------------|-------------|-------------|-------------|
|               | Peak area   | RT          | Tailing     |
| #1            | 119970      | 7.534       | 1.097       | 60663       | 8.168       | 1.147       | 29054       | 8.442       | 1.164       | 20142       | 8.645       | 1.223       |
| #2            | 134818      | 7.539       | 1.096       | 68957       | 8.171       | 1.160       | 34396       | 8.448       | 1.131       | 23445       | 8.649       | 1.216       |
| #3            | 127253      | 7.537       | 1.094       | 64574       | 8.170       | 1.135       | 31738       | 8.445       | 1.158       | 21807       | 8.647       | 1.213       |
| #4            | 132658      | 7.537       | 1.095       | 66586       | 8.171       | 1.126       | 33169       | 8.447       | 1.149       | 22813       | 8.649       | 1.183       |
| #5            | 134538      | 7.540       | 1.105       | 69318       | 8.173       | 1.144       | 35076       | 8.448       | 1.166       | 23518       | 8.650       | 1.215       |
| Average       | 129847      | 7.537       | 1.097       | 66020       | 8.171       | 1.142       | 32687       | 8.446       | 1.154       | 22345       | 8.648       | 1.210       |
| SD            | 6302.817    | 0.002       | 0.004       | 3557.088    | 0.002       | 0.013       | 2395.810    | 0.003       | 0.014       | 1409.575    | 0.002       | 0.016       |
| %CV           | <b>4.85</b> | <b>0.03</b> | <b>0.40</b> | <b>5.39</b> | <b>0.02</b> | <b>1.12</b> | <b>7.33</b> | <b>0.03</b> | <b>1.24</b> | <b>6.31</b> | <b>0.02</b> | <b>1.29</b> |

Table S3. System suitability results under HS equilibration time (intra-variation of 16 min)

| Injection no. | NDMA        |             |             | NDEA        |             |             | EIPNA       |             |             | DIPNA       |             |             |
|---------------|-------------|-------------|-------------|-------------|-------------|-------------|-------------|-------------|-------------|-------------|-------------|-------------|
|               | Peak area   | RT          | Tailing     |
| #1            | 136310      | 7.538       | 1.100       | 68092       | 8.172       | 1.141       | 34293       | 8.448       | 1.124       | 23424       | 8.647       | 1.263       |
| #2            | 134393      | 7.541       | 1.101       | 69253       | 8.174       | 1.140       | 34025       | 8.450       | 1.130       | 23567       | 8.651       | 1.271       |
| #3            | 133069      | 7.539       | 1.099       | 67883       | 8.172       | 1.136       | 33698       | 8.449       | 1.135       | 23391       | 8.650       | 1.215       |
| #4            | 136804      | 7.538       | 1.101       | 69572       | 8.171       | 1.149       | 33899       | 8.445       | 1.174       | 23293       | 8.646       | 1.268       |
| #5            | 142334      | 7.539       | 1.101       | 72469       | 8.172       | 1.133       | 36004       | 8.449       | 1.131       | 24782       | 8.649       | 1.244       |
| Average       | 136582      | 7.539       | 1.100       | 69454       | 8.172       | 1.140       | 34384       | 8.448       | 1.139       | 23691       | 8.649       | 1.252       |
| SD            | 3547.593    | 0.001       | 0.001       | 1834.914    | 0.001       | 0.006       | 931.045     | 0.002       | 0.020       | 617.525     | 0.002       | 0.023       |
| %CV           | <b>2.60</b> | <b>0.02</b> | <b>0.08</b> | <b>2.64</b> | <b>0.01</b> | <b>0.53</b> | <b>2.71</b> | <b>0.02</b> | <b>1.76</b> | <b>2.61</b> | <b>0.02</b> | <b>1.86</b> |

Table S4. System suitability results under transfer line temperature (intra-variation of Typical method: 250°C)

| Injection no. | NDMA        |             |             | NDEA        |             |             | EIPNA       |             |             | DIPNA       |             |             |
|---------------|-------------|-------------|-------------|-------------|-------------|-------------|-------------|-------------|-------------|-------------|-------------|-------------|
|               | Peak area   | RT          | Tailing     |
| #1            | 130505      | 7.532       | 1.126       | 68342       | 8.166       | 1.151       | 34019       | 8.441       | 1.174       | 22763       | 8.642       | 1.268       |
| #2            | 128563      | 7.532       | 1.115       | 66211       | 8.165       | 1.148       | 33529       | 8.440       | 1.185       | 22523       | 8.643       | 1.243       |
| #3            | 121988      | 7.532       | 1.122       | 63913       | 8.166       | 1.154       | 32445       | 8.441       | 1.192       | 21427       | 8.643       | 1.241       |
| #4            | 124316      | 7.533       | 1.132       | 65558       | 8.167       | 1.157       | 33548       | 8.442       | 1.216       | 21427       | 8.644       | 1.275       |
| #5            | 129650      | 7.534       | 1.114       | 67920       | 8.168       | 1.156       | 34665       | 8.443       | 1.196       | 22582       | 8.645       | 1.277       |
| Average       | 127004      | 7.533       | 1.122       | 66389       | 8.166       | 1.153       | 33641       | 8.441       | 1.193       | 22144       | 8.643       | 1.261       |
| SD            | 3676.765    | 0.001       | 0.008       | 1803.538    | 0.001       | 0.004       | 812.876     | 0.001       | 0.016       | 660.837     | 0.001       | 0.017       |
| %CV           | <b>2.89</b> | <b>0.01</b> | <b>0.67</b> | <b>2.72</b> | <b>0.01</b> | <b>0.32</b> | <b>2.42</b> | <b>0.01</b> | <b>1.30</b> | <b>2.98</b> | <b>0.01</b> | <b>1.39</b> |

Table S5. System suitability results under transfer line temperature (intra-variation of 245°C)

| Injection no. | NDMA        |             |             | NDEA        |             |             | EIPNA       |             |             | DIPNA       |             |             |
|---------------|-------------|-------------|-------------|-------------|-------------|-------------|-------------|-------------|-------------|-------------|-------------|-------------|
|               | Peak area   | RT          | Tailing     |
| #1            | 127042      | 7.535       | 1.129       | 65466       | 8.168       | 1.149       | 33123       | 8.443       | 1.165       | 21415       | 8.645       | 1.245       |
| #2            | 125627      | 7.535       | 1.125       | 64358       | 8.169       | 1.156       | 32807       | 8.444       | 1.188       | 21507       | 8.646       | 1.259       |
| #3            | 124766      | 7.535       | 1.121       | 64329       | 8.168       | 1.141       | 32702       | 8.443       | 1.158       | 21132       | 8.644       | 1.265       |
| #4            | 127934      | 7.536       | 1.129       | 66488       | 8.169       | 1.172       | 33336       | 8.445       | 1.187       | 22203       | 8.647       | 1.258       |
| #5            | 125748      | 7.536       | 1.122       | 65250       | 8.169       | 1.166       | 32588       | 8.444       | 1.210       | 21952       | 8.646       | 1.275       |
| Average       | 126223      | 7.535       | 1.125       | 65178       | 8.169       | 1.157       | 32911       | 8.444       | 1.182       | 21642       | 8.646       | 1.260       |
| SD            | 1255.186    | 0.001       | 0.004       | 894.068     | 0.001       | 0.013       | 309.998     | 0.001       | 0.021       | 430.312     | 0.001       | 0.011       |
| %CV           | <b>0.99</b> | <b>0.01</b> | <b>0.33</b> | <b>1.37</b> | <b>0.01</b> | <b>1.08</b> | <b>0.94</b> | <b>0.01</b> | <b>1.75</b> | <b>1.99</b> | <b>0.01</b> | <b>0.87</b> |

Table S6. System suitability results under transfer line temperature (intra-variation of 255°C)

| Injection no. | NDMA        |             |             | NDEA        |             |             | EIPNA       |             |             | DIPNA       |             |             |
|---------------|-------------|-------------|-------------|-------------|-------------|-------------|-------------|-------------|-------------|-------------|-------------|-------------|
|               | Peak area   | RT          | Tailing     |
| #1            | 114794      | 7.537       | 1.114       | 59203       | 8.170       | 1.142       | 29732       | 8.444       | 1.189       | 19559       | 8.646       | 1.236       |
| #2            | 113182      | 7.537       | 1.113       | 58708       | 8.170       | 1.136       | 29054       | 8.444       | 1.185       | 19116       | 8.645       | 1.235       |
| #3            | 116510      | 7.536       | 1.116       | 59298       | 8.169       | 1.145       | 30375       | 8.444       | 1.179       | 20116       | 8.646       | 1.249       |
| #4            | 132082      | 7.538       | 1.127       | 69710       | 8.171       | 1.188       | 34451       | 8.444       | 1.231       | 22914       | 8.646       | 1.336       |
| #5            | 116531      | 7.536       | 1.128       | 61283       | 8.170       | 1.156       | 30941       | 8.443       | 1.229       | 20165       | 8.646       | 1.240       |
| Average       | 118620      | 7.537       | 1.120       | 61640       | 8.170       | 1.153       | 30911       | 8.444       | 1.203       | 20374       | 8.646       | 1.259       |
| SD            | 7652.640    | 0.001       | 0.007       | 4617.166    | 0.001       | 0.021       | 2101.088    | 0.000       | 0.025       | 1483.967    | 0.000       | 0.043       |
| %CV           | <b>6.45</b> | <b>0.01</b> | <b>0.65</b> | <b>7.49</b> | <b>0.01</b> | <b>1.79</b> | <b>6.80</b> | <b>0.01</b> | <b>2.10</b> | <b>7.28</b> | <b>0.01</b> | <b>3.44</b> |

Table S7 System suitability results under HS equilibration time (inter-variation of 14-16 min)

| Variation of HS equilibration time | NDMA        |             |             | NDEA        |             |             | EIPNA       |             |             | DIPNA       |             |             |
|------------------------------------|-------------|-------------|-------------|-------------|-------------|-------------|-------------|-------------|-------------|-------------|-------------|-------------|
|                                    | Peak area   | RT          | Tailing     |
| 15 min                             | 132537      | 7.536       | 1.106       | 67793       | 8.170       | 1.145       | 33400       | 8.446       | 1.144       | 22839       | 8.646       | 1.273       |
| 14 min                             | 129847      | 7.537       | 1.097       | 66020       | 8.171       | 1.142       | 32687       | 8.446       | 1.154       | 22345       | 8.648       | 1.210       |
| 16 min                             | 136582      | 7.539       | 1.100       | 69454       | 8.172       | 1.140       | 34384       | 8.448       | 1.139       | 23691       | 8.649       | 1.252       |
| Average                            | 132989      | 7.537       | 1.101       | 67756       | 8.171       | 1.142       | 33490       | 8.447       | 1.146       | 22958       | 8.648       | 1.245       |
| SD                                 | 3390.141    | 0.002       | 0.005       | 1717.304    | 0.001       | 0.003       | 852.099     | 0.001       | 0.008       | 680.889     | 0.002       | 0.032       |
| %CV                                | <b>2.55</b> | <b>0.02</b> | <b>0.42</b> | <b>2.53</b> | <b>0.01</b> | <b>0.22</b> | <b>2.54</b> | <b>0.01</b> | <b>0.67</b> | <b>2.97</b> | <b>0.02</b> | <b>2.58</b> |

Table S8. System suitability results under transfer line temperature (inter-variation of 245-255°C)

| Variation of Transfer line temperature | NDMA        |             |             | NDEA        |             |             | EIPNA       |             |             | DIPNA       |             |             |
|----------------------------------------|-------------|-------------|-------------|-------------|-------------|-------------|-------------|-------------|-------------|-------------|-------------|-------------|
|                                        | Peak area   | RT          | Tailing     |
| 250 °C                                 | 127004      | 7.533       | 1.122       | 66389       | 8.166       | 1.153       | 33641       | 8.441       | 1.193       | 22144       | 8.643       | 1.261       |
| 245 °C                                 | 126223      | 7.535       | 1.125       | 65178       | 8.169       | 1.157       | 32911       | 8.444       | 1.182       | 21642       | 8.646       | 1.260       |
| 255 °C                                 | 118620      | 7.537       | 1.120       | 61640       | 8.170       | 1.153       | 30911       | 8.444       | 1.203       | 20374       | 8.646       | 1.259       |
| Average                                | 123949      | 7.535       | 1.122       | 64402       | 8.168       | 1.154       | 32488       | 8.443       | 1.193       | 21387       | 8.645       | 1.260       |
| SD                                     | 4631.541    | 0.002       | 0.003       | 2467.690    | 0.002       | 0.002       | 1413.377    | 0.002       | 0.011       | 912.207     | 0.002       | 0.001       |
| %CV                                    | <b>3.74</b> | <b>0.03</b> | <b>0.22</b> | <b>3.83</b> | <b>0.03</b> | <b>0.20</b> | <b>4.35</b> | <b>0.02</b> | <b>0.88</b> | <b>4.27</b> | <b>0.02</b> | <b>0.08</b> |

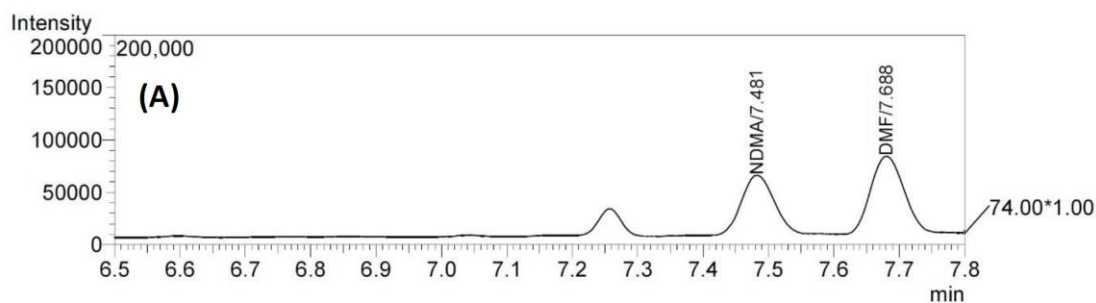

| [MS] ID1 Compound Name:NDMA |                  |           |        |            |
|-----------------------------|------------------|-----------|--------|------------|
| Title                       | Sample Name      | Ret. Time | Area   | Resolution |
| NDMA and DMF.qgd            | DMF and NDMA 1.9 | 7.481     | 182280 | ---        |

| [MS] ID2 Compound Name:DMF |                  |           |        |            |
|----------------------------|------------------|-----------|--------|------------|
| Title                      | Sample Name      | Ret. Time | Area   | Resolution |
| NDMA and DMF.qgd           | DMF and NDMA 1.9 | 7.688     | 266828 | 2.28       |

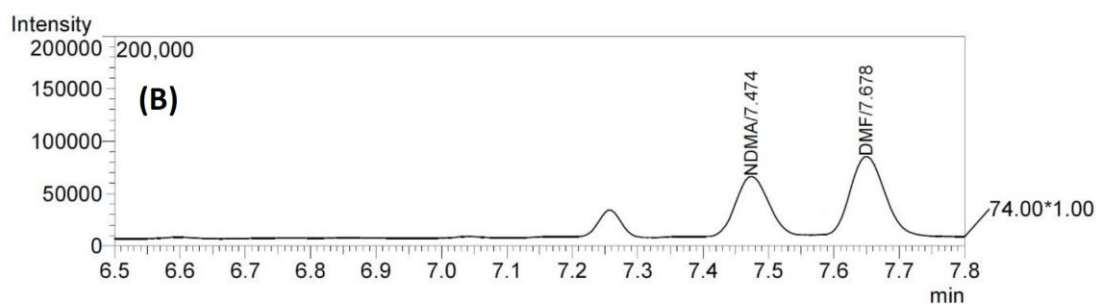

| [MS] ID1 Compound Name:NDMA |              |           |        |            |
|-----------------------------|--------------|-----------|--------|------------|
| Title                       | Sample Name  | Ret. Time | Area   | Resolution |
| NDMA and DMF.qgd            | DMF and NDMA | 7.474     | 178274 | ---        |

| [MS] ID2 Compound Name:DMF |              |           |        |            |
|----------------------------|--------------|-----------|--------|------------|
| Title                      | Sample Name  | Ret. Time | Area   | Resolution |
| NDMA and DMF.qgd           | DMF and NDMA | 7.678     | 260868 | 2.26       |

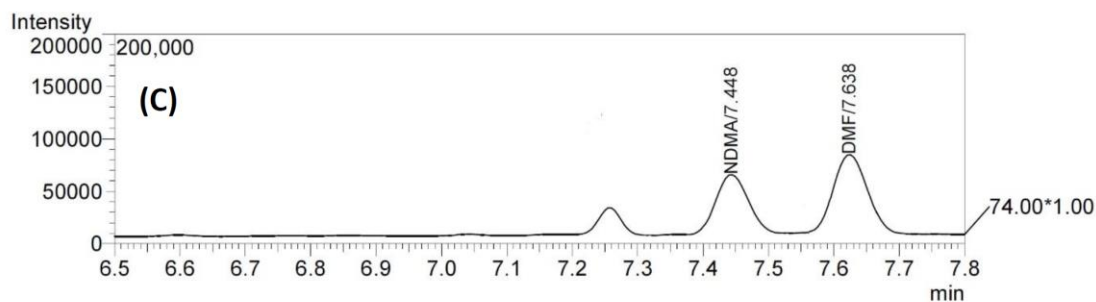

| [MS] ID1 Compound Name:NDMA |                  |           |        |            |
|-----------------------------|------------------|-----------|--------|------------|
| Title                       | Sample Name      | Ret. Time | Area   | Resolution |
| NDMA and DMF.qgd            | DMF and NDMA 2.1 | 7.448     | 178486 | ---        |

| [MS] ID2 Compound Name:DMF |                  |           |        |            |
|----------------------------|------------------|-----------|--------|------------|
| Title                      | Sample Name      | Ret. Time | Area   | Resolution |
| NDMA and DMF.qgd           | DMF and NDMA 2.1 | 7.638     | 261273 | 2.21       |

Figure S2. The representative chromatograms of co-spiked between NDMA and DMF in losartan under the variations of flow rate at (a) 1.9 mL/min (b) 2.0 mL/min (method condition) (c) 2.1 mL/min.
